# Supplementary material for: Multicondition and multimodal temporal profile inference during mouse embryonic development
Source: HighWire-hosted journal article supplement (doi:10.1101/gr.279997.124), 2025-08-14
Supplement: Supplemental_Figures_.zip [file Supplemental_Fig_S6.pdf › Supplemental/Supplemental_Fig_S6.pdf]

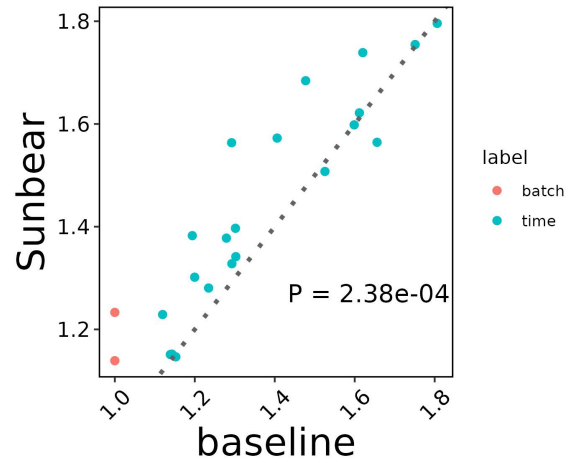

Supplementary Figure S6: **Alignment of multiple datasets across time.** LISI scores are calculated between each pair of neighboring time points (label: time) or between datasets on shared time points (E8.5 and E9.5, label: batch). LISI scores are calculated based on Sunbear's cell embeddings or baseline PCA embeddings of the original gene expression profiles. P-values are calculated by a one-sided Wilcoxon rank-sum test.
