# Supplementary material for: Multicondition and multimodal temporal profile inference during mouse embryonic development
Source: HighWire-hosted journal article supplement (doi:10.1101/gr.279997.124), 2025-08-14
Supplement: Supplemental_Figures_.zip [file Supplemental_Fig_S7.pdf › Supplemental/Supplemental_Fig_S7.pdf]

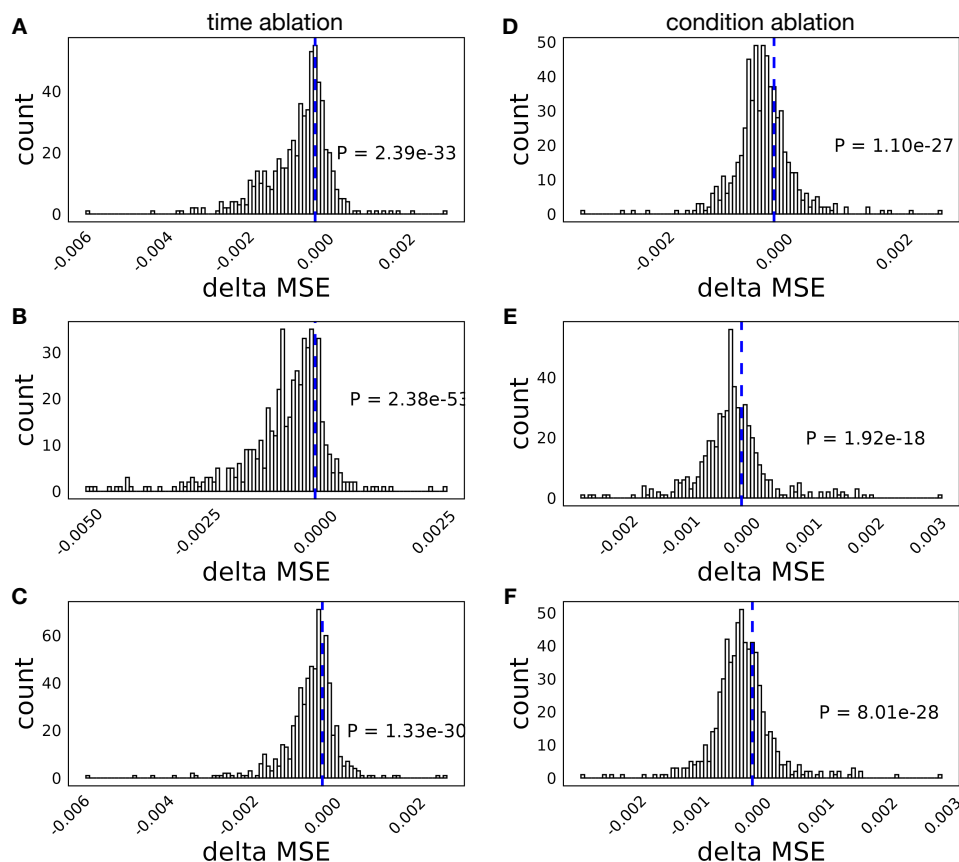

Supplementary Figure S7: **Performance comparison with time and condition factor ablated.** (A) Difference of MSE for Sunbear prediction versus true value and MSE of time-ablated Sunbear prediction versus true value. P-values are calculated by a one-sided Wilcoxon rank-sum test. Query and baseline are selected from the closest previous time point. (B) Difference of MSE for Sunbear prediction versus true value and MSE of condition-ablated Sunbear prediction versus true value. P-values are calculated by a one-sided Wilcoxon rank-sum test. Query and baseline are selected from the closest previous time point. (C) Similar to (A), except query and baseline are selected from the closest subsequent time point. (D) Similar to (B), except query and baseline are selected from the closest subsequent time point. (E) Similar to (A), except query and baseline are selected from the closest previous and subsequent time point. (F) Similar to (B), except query and baseline are selected from the closest previous and subsequent time point.
