# Supplementary material for: Multicondition and multimodal temporal profile inference during mouse embryonic development
Source: HighWire-hosted journal article supplement (doi:10.1101/gr.279997.124), 2025-08-14
Supplement: Supplemental_Figures_.zip [file Supplemental_Fig_S8.pdf › Supplemental/Supplemental_Fig_S8.pdf]

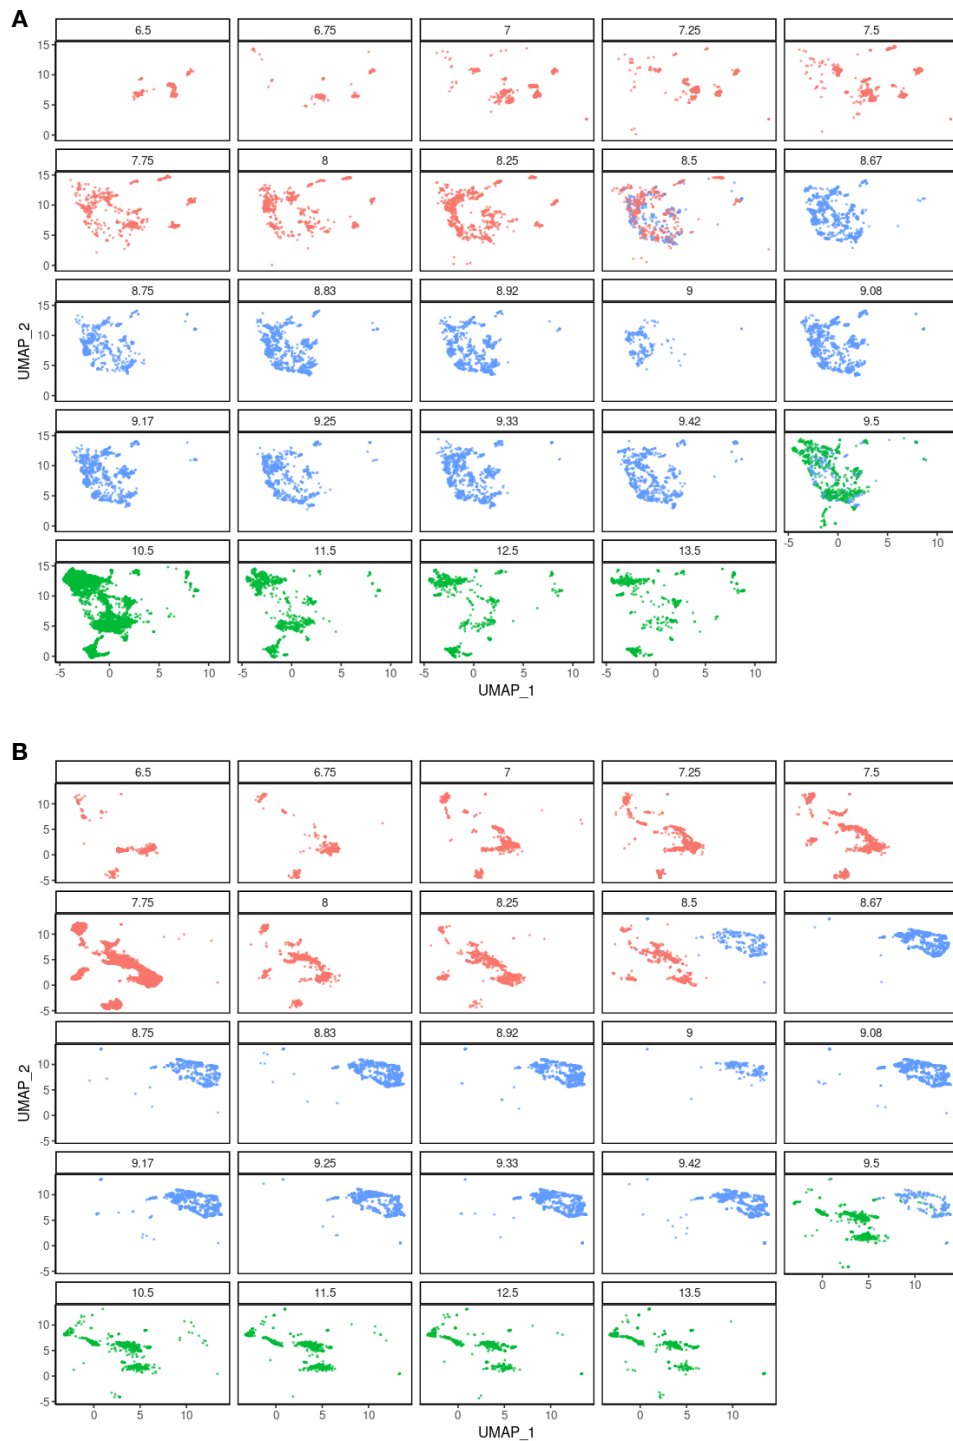

Supplementary Figure S8: **Cell identity embedding alignment with batch-aware and batch-agnostic model.** (A) UMAP of cell identity factors learned by Sunbear from three time-series datasets. Cells are colored by the dataset it is generated from. (B) Similar to A, except cell identity factors are learned by a variant of Sunbear that does not encode batch information.
