# Supplementary material for: Multicondition and multimodal temporal profile inference during mouse embryonic development
Source: HighWire-hosted journal article supplement (doi:10.1101/gr.279997.124), 2025-08-14
Supplement: Supplemental_Figures_.zip [file Supplemental_Fig_S9.pdf › Supplemental/Supplemental_Fig_S9.pdf]

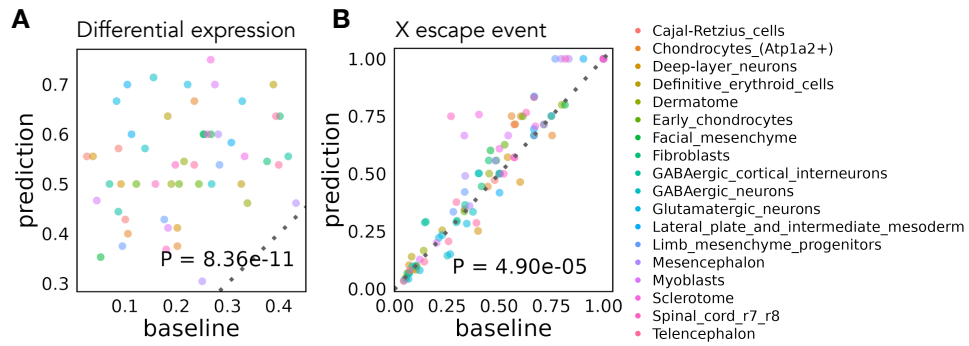

Supplementary Figure S9: **AUPRC on retrieving sex different genes.** (A) Pairwise comparison of Sunbear prediction and the nearest neighbor baseline in recapitulating differential expression patterns in sex-matched time points. Each dot indicates the area under the precision-recall curve (AUPRC) score of recapitulating female/male-biased patterns in each sex-matched time point and cell type. P-values are calculated by a one-sided Wilcoxon rank-sum test. (B) Similar to A, pairwise comparison of Sunbear prediction and the nearest neighbor baseline in ranking escape genes to be more female-biased than all other genes on the X chromosome.
