# Supplementary material for: Multicondition and multimodal temporal profile inference during mouse embryonic development
Source: HighWire-hosted journal article supplement (doi:10.1101/gr.279997.124), 2025-08-14
Supplement: Supplemental_Figures_.zip [file Supplemental_Fig_S11.pdf › Supplemental/Supplemental_Fig_S11.pdf]

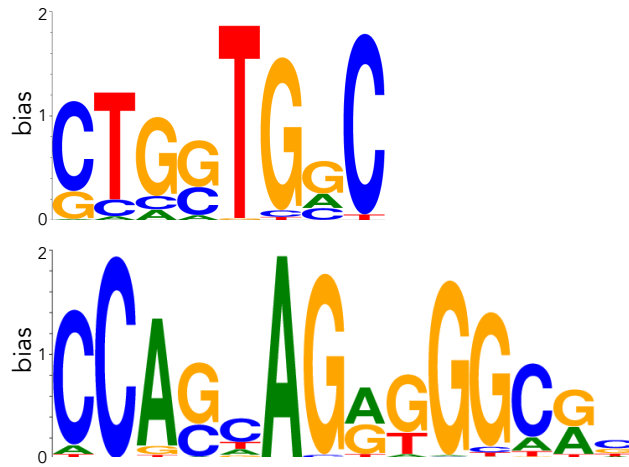

Supplementary Figure S11: **Enriched motifs for regions changing prior to gene expression trends.** Two motifs are enriched for regions changing prior to gene expression trends ( $E\text{-value} \leq 0.05$ ). Out of the two motifs, the upper one does not have significant transcription factor enrichment based on Tomtom ( $q\text{-value} \leq 0.05$ ). The lower motif has four transcription factors enriched: CTCF ( $q\text{-value} = 8.86\text{e-}08$ ), CTCFL ( $q\text{-value} = 8.94\text{e-}06$ ), ZIC2 ( $q\text{-value} = 4.29\text{e-}02$ ), ZIC3 ( $q\text{-value} = 4.29\text{e-}02$ ).
