# Supplementary material for: Multicondition and multimodal temporal profile inference during mouse embryonic development
Source: HighWire-hosted journal article supplement (doi:10.1101/gr.279997.124), 2025-08-14
Supplement: Supplemental_Figures_.zip [file Supplemental_Table_S1.xlsx]

## Sheet: BorderAssociatedMacrophageFemal
gene	medianlogFC	chr
Xist	2.29909	chrX
Gm26992	1.31707	chrX
Kdm6a	0.429046	chrX
Jpx	0.397927	chrX
Eif2s3x	0.387317	chrX
Pbdc1	0.322919	chrX
Kdm5c	0.273045	chrX
Ftx	0.185244	chrX
Ddx3x	0.178141	chrX
Fcgr2b	0.120319	chr1
Hormad2	0.120311	chr11
RP24-286J21.7	0.117003	chr8
Cela1	0.114986	chr15
Epsti1	0.11459	chr14
Samd9l	0.105916	chr6
Ccr5	0.10003	chr9
Trim30a	0.0996415	chr7
Gpr157	0.0981547	chr4
Bst2	0.0913282	chr8
Neurl3	0.0906254	chr1
Vmn2r29	0.0904366	chr7
Ifih1	0.0902284	chr2
Gpr146	0.089029	chr5
Bnip3	0.0874257	chr7
Fem1b	0.0868134	chr9
Zfp984	0.0850007	chr4
Aph1c	0.0840661	chr9
Cysltr1	0.0812305	chrX
Pla2g7	0.0782272	chr17
Nrg4	0.0769223	chr9
Ccdc109b	0.0761982	chr3
Trim30d	0.0751256	chr7
Oasl2	0.0743486	chr5
Soat1	0.072331	chr1
Ddx60	0.0712173	chr8
Zfp36l2	0.0706318	chr17
Rab7b	0.0704286	chr1
Tfpi	0.0700707	chr2
Ncf4	0.0697166	chr15
Sp140	0.0689192	chr1
Lncpint	0.067471	chr6
P4ha1	0.0662577	chr10
Cd93	0.0659918	chr2
Tap1	0.0651843	chr17
Gm5086	0.0651587	chr13
5430427O19Rik/ Tasl	0.0637773	chrX
Fam134b	0.0634909	chr15
Hpse	0.0628898	chr5
Dubr	0.0626156	chr16
Parp14	0.0625416	chr16
Ticam2	0.0616187	chr18
Pon3	0.0605273	chr6
Rel	0.0597923	chr11
Slfn2	0.0592953	chr11
Plekha2	0.0588487	chr8
Csf3r	0.058085	chr4
Hk2	0.0579335	chr6
Kdm3a	0.0578667	chr6
Itgb2	0.0572029	chr10
Ifi204	0.0571059	chr1
Tmem154	0.0565075	chr3
Sp100	0.0563906	chr1
Gbp8	0.0563416	chr5
Tifab	0.055763	chr13
Sat1	0.0556471	chrX
BC068281	0.0553684	chr12
Parp9	0.0549488	chr16
Arap1	0.0545377	chr7
Sergef	0.0541592	chr7
Il21r	0.0536414	chr7
Fcrls	0.0530832	chr3
Itgam	0.0530553	chr7
Itgam	0.0530553	chr7
Utp14a	0.0530234	chrX
Chchd7	0.0523899	chr4
Sla	0.0523832	chr15
Slc29a3	0.0520938	chr10
Ahnak	0.0519371	chr19
Siae	0.0517112	chr9
Gm26532	0.0516102	chr8
Pycard	0.0515452	chr7
Ninj1	0.0513457	chr13
Pde8a	0.0511618	chr7
Gm20388	0.0511419	chr8
Cerk	0.0511186	chr15
P2rx4	0.0506068	chr5
Tmem144	0.0499073	chr3
Fam162a	0.0496218	chr16
Ostf1	0.0491637	chr19
Hgf	0.048541	chr5
Irf1	0.0477392	chr11
Nlrp1b	0.0476934	chr11
Csf2rb	0.0476638	chr15
B2m	0.04735	chr2
Ly9	0.0473468	chr1
Asl	0.047332	chr5
Tsc22d3/Gilz	0.0473101	chrX
Gm20707	0.0470062	chr4
Ms4a6b	0.0459894	chr19
Tnfrsf1b	0.0459576	chr4
B3gnt2	0.0458464	chr11
Gm8369	0.0453057	chr19
Itgal	0.0452365	chr7
Hs1bp3	0.0450763	chr12
Lars2	0.04468	chr9
Mtfmt	0.0443005	chr9
Slfn3	0.0440536	chr11
Zbtb38	0.0438125	chr9
Tlr6	0.0431385	chr5
Serac1	0.0431211	chr17
Lsp1	0.0430335	chr7
Rer1	0.0429232	chr4
Adgb	0.0429081	chr10
Poln	0.0428624	chr5
Ccdc167	0.0427837	chr17
Tuft1	0.0424776	chr3
Trim25	0.0424064	chr11
Abcb1b	0.0423664	chr5
Milr1	0.0420292	chr11
Slc22a5	0.0418743	chr11
Akr1e1	0.0405047	chr13
Rilpl2	0.0400133	chr5
Nfs1	0.0397296	chr2
Scpep1	0.0395245	chr11
I830077J02Rik	0.0395133	chr3
Il13ra1	0.0394086	chrX
Sbds	0.0393461	chr5
Sp1	0.0391562	chr15
Slamf6	0.0391246	chr1
Stambp	0.0390705	chr6
Atmin	0.0390547	chr8
Sema4d	0.0388519	chr13
Glipr1	0.0388193	chr10
Pygl	0.0387916	chr12
Trim34a	0.0385243	chr7
Ggact	0.0383044	chr14
Alg6	0.038185	chr4
Tifa	0.0378728	chr3
Nlrp1a	0.0378009	chr11
Mylip	0.0376056	chr13
Skil	0.0372356	chr3
4931406P16Rik	0.036861	chr7
Abi3	0.0368254	chr11
Mpc1	0.0366577	chr17
Cep83os	0.036549	chr10
Mfsd8	0.0365205	chr3
Ptpn6	0.0364634	chr6
Pkig	0.0364589	chr2
Mpp7	0.0364419	chr18
Fam63b	0.0358808	chr9
Apob	0.0354973	chr12
Rasgrp1	0.0353938	chr2
Zfp617	0.034998	chr8
Tmem176b	0.0349592	chr6
Vamp8	0.0348877	chr6
Ifitm3	0.0348843	chr7
Pgap2	0.0347952	chr7
Hnrnph2	0.0345842	chrX
Tollip	0.0344959	chr7
Osbpl3	0.0344732	chr6
Npc1	0.0343913	chr18
Spen	0.0342393	chr4
RP24-167A12.1	0.0338873	chr10
Klf3	0.0337015	chr5
Nufip2	0.0335109	chr11
Hacd4	0.0334821	chr4
Fam53b	0.0334739	chr7
Egln1	0.0334299	chr8
Pdk1	0.0334237	chr2
Khnyn	0.0333791	chr14
Acox1	0.0333687	chr11
Adamts6	0.0331446	chr13
Ccpg1	0.0331369	chr9
3300002I08Rik	0.0330811	chr2
Elmsan1	0.0330463	chr12
Ipp	0.0328895	chr4
Commd3	0.0327726	chr2
Dclre1a	0.0327566	chr19
Pym1	0.0327464	chr10
Spcs2	0.0325822	chr7
Txn1	0.0325779	chr4
Slc2a9	0.0325106	chr5
Crot	0.0324383	chr5
Bank1	0.0323829	chr3
Itga6	0.0323514	chr2
Gna13	0.0320495	chr11
Elk4	0.0311005	chr1
Ethe1	0.0310445	chr7
Gins3	0.0310441	chr8
Dpy30	0.030877	chr17
Zkscan1	0.0308715	chr5
Mmaa	0.0307921	chr8
Gm42418	0.0307028	chr17
Srd5a3	0.0306821	chr5
Zbtb34	0.0306697	chr2
Plek	0.0305487	chr11
Ensa	0.0303878	chr3
Tmem209	0.0302527	chr6
Ifnar1	0.0301766	chr16
Arl4c	0.0299817	chr1
Wsb1	0.0299553	chr11
Tgfbr2	0.0295065	chr9
Birc3	0.0294845	chr9
Ddx47	0.0294554	chr6
Tbc1d8b	0.0294531	chrX
Zc3hav1	0.0291786	chr6
Syce2	0.0291745	chr8
Zfp160	0.0289522	chr17
Lpar6	0.0288689	chr14
B130006D01Rik	0.0288651	chr11
Anxa7	0.028855	chr14
Rgs2	0.0287832	chr1
Tmem170b	0.0286847	chr13
Armc7	0.0285719	chr11
Zfp871	0.0283745	chr17
Zcchc24	0.0282949	chr14
Tex2	0.0281348	chr11
Rp9	0.0279898	chr9
Tmed8	0.0277338	chr12
Zfp655	0.02758	chr5
Ccdc58	0.0275365	chr16
Mrps17	0.0275085	chr5
Bach1	0.0273869	chr16
Mfsd7b	0.0273585	chr1
Zfp873	0.0271362	chr10
Pex11b	0.0270793	chr3
AU020206	0.0270723	chr7
Seh1l	0.0270377	chr18
Elovl5	0.0269739	chr9
Fam199x	0.0269036	chrX
Gipc1	0.026848	chr8
Ctps2	0.0266799	chrX
Bbip1	0.0265451	chr19
Naip5	0.0265437	chr13
Smim14	0.0265355	chr5
Sys1	0.0263891	chr2
Gnptab	0.0262088	chr10
Fbxl3	0.0261824	chr14
Slc38a7	0.0258939	chr8
Zfp426	0.0258376	chr9
Vapb	0.0258283	chr2
Sertad2	0.0257929	chr11
Sgk3	0.0257651	chr1
Rhbdf2	0.0256672	chr11
Rnft1	0.0254693	chr11
Map3k1	0.025448	chr13
Tceanc2	0.0254028	chr4
Ifngr1	0.0252823	chr10
Zfp652	0.0249346	chr11
Atp6v0d1	0.0248608	chr8
Rmi1	0.024771	chr13
Daglb	0.024753	chr5
Tet2	0.0247	chr3
Ttc33	0.0246176	chr15
Ripk2	0.0245463	chr4
Commd9	0.0245307	chr2
Grsf1	0.0244303	chr5
Fbxo30	0.0243703	chr10
Fig4	0.0243184	chr10
Tbpl1	0.024091	chr10
Tbc1d15	0.0240482	chr10
Ipmk	0.0238797	chr10
Cd300c2	0.0238779	chr11
Cd33	0.0238446	chr7
Prdm9	0.0238029	chr17
Zfp101	0.0237541	chr17
Ankra2	0.0235646	chr13
Zfp607a	0.0235456	chr7
Zfp142	0.0234679	chr1
Zkscan8	0.023429	chr13
Mfn1	0.0234101	chr3
Zbtb37	0.0233894	chr1
Rrbp1	0.0233706	chr2
Dsn1	0.0233231	chr2
Prr11	0.0225514	chr11
Maml1	0.0224112	chr11
Myl12b	0.0223263	chr17
Ikbkg	0.022318	chrX
Zfp62	0.0222856	chr11
Chmp2b	0.0220854	chr16
Zfp654	0.0220352	chr16
Usp38	0.0220292	chr8
Elac1	0.0218648	chr18
Zscan21	0.0218444	chr5
Dstyk	0.0217085	chr1
Mob1a	0.0215272	chr6
Fam210a	0.021327	chr18
Zbtb5	0.0212388	chr4
Cradd	0.0212199	chr10
Fam129a	0.0212137	chr1
Zbtb26	0.0211952	chr2
Pskh1	0.0208826	chr8
Gm6712	0.0207909	chr17
B3gntl1	0.0205011	chr11
Cnep1r1	0.0200916	chr8
N4bp2l2	0.0196692	chr5
Adnp2	0.0196276	chr18
Apaf1	0.019493	chr10
Pdik1l	0.0192641	chr4
Gmnn	0.0191271	chr13
Fez2	0.0191038	chr17
Pcf11	0.019041	chr7
Mcm9	0.0189831	chr10
Rnf7	0.0189011	chr9
Mccc1	0.0187877	chr3
Ssh1	0.0187515	chr5
Tmed7	0.0187389	chr18
Sppl2a	0.0187268	chr2
Dscr3	0.0184581	chr16
Mynn	0.0182047	chr3
Ttc1	0.0181921	chr11
Skp1a	0.0179958	chr11
Orc3	0.0178246	chr4
Ip6k1	0.0176614	chr9
Pon2	0.0174232	chr6
Socs5	0.017393	chr17
Eif2ak3	0.0173522	chr6
Txndc15	0.0172765	chr13
Phf10	0.0169028	chr17
Fryl	0.0166075	chr5
Msn	0.0164528	chrX
Chmp4b	0.0162525	chr2
Mapk1ip1l	0.016182	chr14
Gatad2a	0.0160743	chr8
Mecp2	0.0160293	chrX
Lyrm1	0.0160149	chr7
Ssu72	0.0156895	chr4
Fundc1	0.0156562	chrX
Bid	0.0155678	chr6
Cnih4	0.0155166	chr1
Peli1	0.0152311	chr11
Rprd1b	0.0149867	chr2
Usp4	0.01478	chr9
Dmtf1	0.0146633	chr5
D6Wsu163e	0.0145811	chr6
Ppp4r2	0.0143641	chr6
Mpp5	0.0140927	chr12
Gpatch2l	0.0139764	chr12
Myh9	0.0137902	chr15
Crk	0.013613	chr11
Lsm14a	0.0135756	chr7
Ndufv2	0.0134946	chr17
Sdhaf2	0.0134883	chr19
Atf1	0.0129858	chr15
Tmem159	0.0128913	chr7
Tcf25	0.0124975	chr8
Fbxo3	0.0118518	chr2
Minos1	0.0117967	chr4
Fyttd1	0.0117563	chr16
Aebp2	0.0115566	chr6
Xpo5	0.0113976	chr17
Wdr61	0.0112055	chr9
Wdr33	0.0111216	chr18
Gpbp1	0.0106673	chr13
Cdc37l1	0.00976702	chr19
Pafah1b2	0.00961705	chr9

## Sheet: BorderAssociatedMacrophageMale
gene	medianlogFC	chr
Eif2s3y	-1.812	chrY
Ddx3y	-1.7751	chrY
Kdm5d	-1.77112	chrY
Uty	-1.67261	chrY
Mid1	-0.155974	chrX
Rnf17	-0.140944	chr14
Stag3	-0.114605	chr5
Icos	-0.108585	chr1
Nudt16	-0.0919316	chr9
Tshz3	-0.0900816	chr7
Ccl6	-0.0859992	chr11
Poldip3	-0.0764234	chr15
Flt3l	-0.0718129	chr7
Nnat	-0.0696647	chr2
Tubb2a	-0.0696149	chr13
Zfp760	-0.0678999	chr17
Epo	-0.0663676	chr5
Leng9	-0.065574	chr7
Ifi35	-0.0646832	chr11
Ucp2	-0.0635819	chr7
Cyp27a1	-0.0619785	chr1
Cfp	-0.0619298	chrX
Mier2	-0.060487	chr10
Tnfrsf25	-0.0601687	chr4
Rpl28	-0.0590543	chr7
Tepsin	-0.0586207	chr11
Rps9	-0.0580878	chr7
Fscn1	-0.0576094	chr5
Mllt6	-0.0574747	chr11
Alox5	-0.0568166	chr6
Slc17a9	-0.0568038	chr2
Afdn	-0.0567783	chr17
Pstpip1	-0.0566951	chr9
Marcksl1	-0.0557914	chr4
Leng8	-0.0555264	chr7
Pold1	-0.0554091	chr7
Gabbr1	-0.0551649	chr17
Gm26917	-0.0547296	chr17
Minpp1	-0.0539993	chr19
Mxd4	-0.0534756	chr5
Sh3glb2	-0.053298	chr2
2310033P09Rik	-0.0530533	chr11
Ipo4	-0.0527862	chr14
Tmem86b	-0.0527165	chr7
Zfp518a	-0.0523527	chr19
Haghl	-0.0522011	chr17
Dvl1	-0.0519236	chr4
Ighmbp2	-0.0518546	chr19
Pnpo	-0.0507861	chr11
Ankle1	-0.0506994	chr8
Cactin	-0.0503566	chr10
Tubb5	-0.0502472	chr17
Tbl3	-0.0498861	chr17
B430306N03Rik	-0.0491899	chr17
BC037034	-0.0490146	chr5
Sars2	-0.048287	chr7
Mpi	-0.0481646	chr9
Traip	-0.0480314	chr9
Skiv2l	-0.0479242	chr17
Dcaf15	-0.0469756	chr8
2700081O15Rik	-0.0468472	chr19
Clasrp	-0.0466574	chr7
Rbpj	-0.0465131	chr5
Cass4	-0.0462593	chr2
Armc5	-0.0461377	chr7
Cd2bp2	-0.045976	chr7
Arhgdia	-0.0458916	chr11
Ckb	-0.0458492	chr12
Pabpn1	-0.0455203	chr14
Csad	-0.0455112	chr15
Ncln	-0.0453274	chr10
Wdr13	-0.0452498	chrX
Pbx3	-0.0445439	chr2
Ubc	-0.0444798	chr5
Cherp	-0.0442139	chr8
Ceacam1	-0.0441995	chr7
Nelfcd	-0.0440244	chr2
Nr3c2	-0.043358	chr8
Rpl7	-0.043319	chr1
Gna11	-0.0432211	chr10
Slc46a3	-0.0431637	chr5
Arf5	-0.0431353	chr6
Fkbp2	-0.0426655	chr19
Rpl22	-0.0423091	chr4
Dus3l	-0.0421765	chr17
Dpp9	-0.0419182	chr17
Dus1l	-0.0417893	chr11
Ap5z1	-0.0417702	chr5
Ppm1m	-0.0417464	chr9
Dalrd3	-0.0417121	chr9
Dock6	-0.0416618	chr9
Mbd6	-0.0416582	chr10
Tmem8	-0.0413329	chr17
Gorasp1	-0.0408833	chr9
Snca	-0.0408744	chr6
Wdr62	-0.0406734	chr7
Gpr137c	-0.0406147	chr14
2410002F23Rik	-0.0405897	chr7
Bahcc1	-0.0405883	chr11
Tmem265	-0.0405539	chr7
Bscl2	-0.040475	chr19
Ranbp3	-0.0404339	chr17
Gm5914	-0.0401617	chr8
Tssc4	-0.0400335	chr7
Rps15	-0.039992	chr10
Tsta3	-0.039825	chr15
Laptm5	-0.0397786	chr4
Pkia	-0.0396634	chr3
Ipo13	-0.0396084	chr4
Ccdc107	-0.0395816	chr4
Hectd3	-0.0395093	chr4
Lyl1	-0.0394739	chr8
Wiz	-0.0392651	chr17
Chrac1	-0.0390997	chr15
Eif5a	-0.0390665	chr11
Slc2a8	-0.0387717	chr2
Plcb2	-0.0387657	chr2
Rhbdd3	-0.0386938	chr11
Man2c1	-0.0384768	chr9
Telo2	-0.0383931	chr17
Zfp513	-0.0383146	chr5
Ccdc22	-0.0383126	chrX
Cyb5r3	-0.0382535	chr15
Mlf2	-0.0377867	chr6
Creld2	-0.0377298	chr15
Nkiras2	-0.0376207	chr11
Brpf3	-0.0375185	chr17
Cables2	-0.0374935	chr2
Lypla2	-0.0373905	chr4
Tecpr1	-0.0373704	chr5
Sap25	-0.0371298	chr5
Dok2	-0.0371161	chr14
Pdrg1	-0.0370961	chr2
Nsmf	-0.0365584	chr2
Hhex	-0.0364363	chr19
Gramd1a	-0.0364045	chr7
Rtel1	-0.0362368	chr2
Fbxw9	-0.0362293	chr8
Tysnd1	-0.0358529	chr10
Tspyl2	-0.0358122	chrX
Safb2	-0.035812	chr17
Ankrd54	-0.0357385	chr15
Pls3	-0.0357128	chrX
3110002H16Rik	-0.0356609	chr18
Rbck1	-0.0355645	chr2
Necap2	-0.0354985	chr4
Basp1	-0.0353686	chr15
Ubb	-0.0352028	chr11
Pde1b	-0.0351741	chr15
5430416N02Rik	-0.0351732	chr5
Yars	-0.0351314	chr4
Timm50	-0.0349928	chr7
Cyc1	-0.0349847	chr15
Fkbp4	-0.0349647	chr6
Grk5	-0.0349434	chr19
Tmem109	-0.0347404	chr19
Dgat1	-0.034712	chr15
Faap100	-0.0346987	chr11
Rab24	-0.0346836	chr13
Hdac10	-0.03464	chr15
Inafm1	-0.0345994	chr7
Fbrs	-0.034532	chr7
Zfp598	-0.0345016	chr17
Rps3a1	-0.0344196	chr3
Isyna1	-0.0343125	chr8
Banp	-0.0342967	chr8
Rhot2	-0.0342082	chr17
Gm26522	-0.0340396	chr7
Raet1e	-0.0340389	chr10
Josd2	-0.0339668	chr7
Hdac6	-0.0339218	chrX
Nkap	-0.0338031	chrX
Znhit6	-0.0337145	chr3
Bcl2l12	-0.0336981	chr7
Rogdi	-0.0335612	chr16
Adgrl1	-0.0335563	chr8
Shisa5	-0.0335451	chr9
Thoc6	-0.0335416	chr17
Pnkp	-0.0333998	chr7
Acd	-0.0333328	chr8
Pygo2	-0.0332862	chr3
Tsc2	-0.0332809	chr17
Snapc4	-0.0332455	chr2
Mib2	-0.0331857	chr4
Sf3a2	-0.0330413	chr10
Haus5	-0.0330038	chr7
Ruvbl2	-0.0330012	chr7
Zfpl1	-0.0329032	chr19
Gps2	-0.0327912	chr11
Adprhl2	-0.0327712	chr4
Zfp276	-0.0327623	chr8
Eif3d	-0.0326857	chr15
Zdhhc16	-0.0324389	chr19
Acap3	-0.0322432	chr4
Rrm2b	-0.0320866	chr15
Ddx5	-0.0320365	chr11
Ppp2r1a	-0.032011	chr17
Pex5	-0.0319891	chr6
Eml3	-0.0319589	chr19
Vasp	-0.0319543	chr7
Mknk2	-0.0319345	chr10
Lrrc45	-0.031762	chr11
Zfp335	-0.0317172	chr2
Ust	-0.0316617	chr10
1110038F14Rik	-0.031384	chr15
Cep290	-0.0313506	chr10
Eif3b	-0.0311673	chr5
Kat2a	-0.0311337	chr11
Rpl12	-0.0309702	chr2
Dot1l	-0.0309367	chr10
Trappc9	-0.030865	chr15
Iffo2	-0.0308404	chr4
Psme2	-0.0308334	chr14
Nubpl	-0.0308309	chr12
Mbd3	-0.0307865	chr10
Paf1	-0.0307693	chr7
Trim21	-0.0307515	chr7
Ppan	-0.0304738	chr9
Klc2	-0.0304247	chr19
Nxf1	-0.0303824	chr19
Mcm4	-0.0303578	chr16
Htatip2	-0.0302702	chr7
Tmem259	-0.0302651	chr10
Psmd3	-0.0299709	chr11
Cdipt	-0.0298655	chr7
Fibp	-0.0298615	chr19
Atf6b	-0.0298015	chr17
Akt1s1	-0.029783	chr7
Tln2	-0.0297314	chr9
Smim7	-0.0297306	chr8
Ap1m1	-0.0296219	chr8
Meaf6	-0.0295103	chr4
Klhl17	-0.0294037	chr4
Cfl1	-0.029331	chr19
Bnip1	-0.0291701	chr17
Tacc3	-0.0291594	chr5
Aup1	-0.0291467	chr6
Tbcd	-0.0291272	chr11
4930427A07Rik	-0.0289975	chr12
Lemd2	-0.0289744	chr17
Parg	-0.0288474	chr14
Ctdnep1	-0.0287551	chr11
Homer3	-0.0287372	chr8
Pigq	-0.0285567	chr17
Git1	-0.0284973	chr11
Camta1	-0.0284739	chr4
Poc5	-0.0284138	chr13
Sharpin	-0.028366	chr15
Fam64a	-0.0283314	chr11
Ispd	-0.0283106	chr12
Epn1	-0.0282499	chr7
Heatr6	-0.0281912	chr11
Zmat2	-0.0281709	chr18
Ilvbl	-0.0280964	chr10
Cdk5	-0.028081	chr5
Ppm1g	-0.028079	chr5
Ppp1r9a	-0.028078	chr6
Smg9	-0.0280189	chr7
Pex6	-0.02796	chr17
Cc2d2a	-0.0279443	chr5
Arl6ip4	-0.0279125	chr5
Mgmt	-0.0278864	chr7
Bag6	-0.0278628	chr17
Polrmt	-0.0278101	chr10
Flad1	-0.0278085	chr3
Ppfia1	-0.027773	chr7
Nusap1	-0.0277704	chr2
Cxxc1	-0.0277206	chr18
Fbxw8	-0.0277022	chr5
Vps9d1	-0.0272887	chr8
Lztr1	-0.027204	chr16
Cep44	-0.0271335	chr8
Rrp1	-0.0270179	chr10
Atat1	-0.0269939	chr17
Tmem198b	-0.0269436	chr10
Cpsf1	-0.0269425	chr15
Eif3g	-0.0268327	chr9
Ttc27	-0.026791	chr17
Tmem201	-0.0267486	chr4
Apeh	-0.0266392	chr9
Psen2	-0.026615	chr1
Snf8	-0.0265136	chr11
Med25	-0.026431	chr7
Fam208a	-0.0263775	chr14
Mis18bp1	-0.0263715	chr12
Slc25a14	-0.0262621	chrX
Ilk	-0.0262382	chr7
Gtf3c5	-0.0262088	chr2
Gen1	-0.0261789	chr12
Atp13a2	-0.0258132	chr4
Ddx41	-0.0257757	chr13
Adamts10	-0.0256934	chr17
Smyd5	-0.0256021	chr6
Rab4b	-0.0254959	chr7
Nit1	-0.0254942	chr1
Ercc2	-0.0254257	chr7
Cc2d1a	-0.0251742	chr8
Zmiz2	-0.0249484	chr11
Chpf2	-0.0248393	chr5
Sec23b	-0.0248387	chr2
Sugct	-0.0247261	chr13
Arfip2	-0.0245699	chr7
Ufl1	-0.0244871	chr4
Kif23	-0.0244831	chr9
Arhgef2	-0.0244722	chr3
Ercc8	-0.0242497	chr13
Fcer1g	-0.0242396	chr1
Cdk16	-0.0240565	chrX
Mars	-0.024027	chr10
Trim12c	-0.0240187	chr7
Ptov1	-0.0240051	chr7
Megf8	-0.0239529	chr7
Nubp1	-0.0239225	chr16
Cpsf4	-0.0238814	chr5
Aaas	-0.0238685	chr15
Copg1	-0.0236705	chr6
Taf6	-0.023638	chr5
Fam133b	-0.0236204	chr5
Vps4a	-0.0235958	chr8
Mettl4	-0.0235646	chr17
Dnajc27	-0.0235364	chr12
Ect2	-0.0234982	chr3
Ccnl2	-0.0234222	chr4
Ttll3	-0.0234092	chr6
Usp24	-0.0233929	chr4
Setd1a	-0.0233926	chr7
Cope	-0.0232896	chr8
Cenpp	-0.0232313	chr13
Spata5	-0.0231892	chr3
C330027C09Rik	-0.0231783	chr16
Pkmyt1	-0.0231544	chr17
Dnaja1	-0.0231072	chr4
Ptpn23	-0.0230899	chr9
Arf2	-0.0230369	chr11
Cdca2	-0.0230298	chr14
Slc25a26	-0.0229271	chr6
Nmnat1	-0.0229184	chr4
Ttc32	-0.0226789	chr12
Dda1	-0.0225831	chr8
Sphk2	-0.0225602	chr7
Phb	-0.0225226	chr11
Rbsn	-0.0223771	chr6
Txnrd2	-0.0222369	chr16
Tchp	-0.0222255	chr5
Neurl4	-0.0222242	chr11
Upf1	-0.0221966	chr8
Clcn5	-0.0221942	chrX
Rps6kc1	-0.0221713	chr1
Suds3	-0.0221009	chr5
Kif22	-0.0220029	chr7
Clcn7	-0.0219415	chr17
Dazap1	-0.0219203	chr10
Fam53c	-0.0217912	chr18
Herc2	-0.0217438	chr7
Mcm10	-0.0217325	chr2
Trim11	-0.0215138	chr11
Rnf40	-0.0214393	chr7
Utp15	-0.0212748	chr13
Nt5m	-0.0211877	chr11
Hps1	-0.0211403	chr19
Pkd1	-0.0211323	chr17
Wars	-0.0210326	chr12
Gm15800	-0.020969	chr5
Kif5b	-0.0209538	chr18
Atad3a	-0.0209001	chr4
Ddx55	-0.020898	chr5
Spdl1	-0.0208881	chr11
Med8	-0.0208573	chr4
Ttc4	-0.0207689	chr4
Wbscr22	-0.0207135	chr5
Agtpbp1	-0.0206132	chr13
Lrpprc	-0.0205695	chr17
Dlst	-0.0205216	chr12
BC017158	-0.0204729	chr7
Wdr83	-0.0204719	chr8
Crcp	-0.0204189	chr5
Gpsm2	-0.0203875	chr3
Atg16l1	-0.0202552	chr1
Preb	-0.0201454	chr5
Ezh2	-0.0201223	chr6
Ttf2	-0.0199902	chr3
Ccdc9	-0.0199474	chr7
Malsu1	-0.0199007	chr6
Eef1g	-0.0198914	chr19
Rad52	-0.0198741	chr6
Wasl	-0.0197218	chr6
Mapkap1	-0.019693	chr2
Rexo4	-0.0196371	chr2
Cdan1	-0.0196264	chr2
Dmxl1	-0.0195518	chr18
Kcnk6	-0.019551	chr7
Rbbp5	-0.0194981	chr1
Fggy	-0.0194928	chr4
Kars	-0.0194303	chr8
Rpl34	-0.019411	chr3
Taf2	-0.0193857	chr15
Rbms1	-0.0193608	chr2
Gas8	-0.0193598	chr8
Mms22l	-0.0192263	chr4
Zwint	-0.0191961	chr10
Sucla2	-0.0190767	chr14
Atxn7l3	-0.0190555	chr11
Rttn	-0.0190459	chr18
Birc6	-0.0190436	chr17
Map4k4	-0.0190328	chr1
Vps16	-0.0189796	chr2
Zfp995	-0.0189392	chr17
Psme4	-0.0189131	chr11
Vipas39	-0.0189045	chr12
Smn1	-0.0188604	chr13
Cript	-0.0188466	chr17
Fxr1	-0.018724	chr3
Kmt2c	-0.0185001	chr5
Orc5	-0.0184263	chr5
Rnf219	-0.0182978	chr14
Rint1	-0.0182651	chr5
Nosip	-0.0181471	chr7
Synj2bp	-0.0181369	chr12
Nudcd3	-0.0181309	chr11
Inpp5f	-0.018101	chr7
Rap2c	-0.0180826	chrX
Ubtf	-0.0180203	chr11
Adprh	-0.0179848	chr16
Mthfd2l	-0.0179197	chr5
Fmr1	-0.0178723	chrX
Hgs	-0.0177692	chr11
Fam118b	-0.0177256	chr9
Dpm1	-0.0176573	chr2
Msh3	-0.0176452	chr13
Strn4	-0.0176074	chr7
Tmem199	-0.0175848	chr11
Sfi1	-0.0174475	chr11
Tcerg1	-0.0173661	chr18
Scaf8	-0.0172073	chr17
Rock2	-0.0171898	chr12
6030458C11Rik	-0.0169573	chr15
Fus	-0.0169504	chr7
Fubp1	-0.0168816	chr3
Usp5	-0.0168479	chr6
Qtrt1	-0.0167831	chr9
Eps15l1	-0.0167403	chr8
Ttc3	-0.0166807	chr16
Stoml1	-0.0166675	chr9
Nelfe	-0.0165214	chr17
Mprip	-0.0164996	chr11
Ppil4	-0.0164654	chr10
Gpatch1	-0.0164183	chr7
Fbf1	-0.0163837	chr11
Tmem214	-0.0163671	chr5
Rbm8a	-0.0163665	chr3
Phf14	-0.0162981	chr6
Arel1	-0.0162575	chr12
Prdm15	-0.0161855	chr16
B3gat3	-0.016133	chr19
Pccb	-0.016099	chr9
Ccdc61	-0.0160761	chr7
Cct3	-0.0158973	chr3
Ints6l	-0.0158874	chrX
Bcl7b	-0.0158816	chr5
Exosc8	-0.0155549	chr3
Snrnp48	-0.0154853	chr13
Uchl3	-0.015378	chr14
Txlna	-0.0153454	chr4
Tmem55b	-0.015317	chr14
Zfp53	-0.0152354	chr17
Cyhr1	-0.0149565	chr15
Brd8	-0.0148516	chr18
Armc9	-0.0145538	chr1
Ecd	-0.0145366	chr14
Atp5c1	-0.0144462	chr2
Rps25	-0.014426	chr9
Zmynd11	-0.0144019	chr13
Srpk1	-0.0143403	chr17
Prkra	-0.0142418	chr2
Ints8	-0.0140094	chr4
Hnrnpr	-0.0139486	chr4
Rpl17	-0.0139017	chr18
Top1	-0.0137956	chr2
Fra10ac1	-0.0137647	chr19
Mta2	-0.0136768	chr19
Ergic2	-0.01354	chr6
Vwa9	-0.0134389	chr9
Nmt2	-0.0132964	chr2
Dis3l	-0.0132045	chr9
Fubp3	-0.0128108	chr2
Ascc2	-0.0127281	chr11
Abcc5	-0.0126545	chr16
Iqcb1	-0.0120506	chr16
Gak	-0.0120287	chr5
Nsmce2	-0.01184	chr15
Thrap3	-0.0116468	chr4
AI314180	-0.011448	chr4
Aggf1	-0.0114327	chr13
Ehmt1	-0.0113116	chr2
Tulp4	-0.0103874	chr17
Atf7ip	-0.0103813	chr6
Ripk1	-0.0103558	chr13
Rtcb	-0.00955846	chr10
Vti1b	-0.009494	chr12
Ep400	-0.0094652	chr5
Krit1	-0.00912418	chr5

## Sheet: BorderAssociatedMacrophageGObp
sex	biological process	enrichment score
female	innate immune response activating signaling pathway	4.43302
female	activation of innate immune response	3.90481
female	defense response to symbiont	3.31424
female	cytosolic pattern recognition receptor signaling pathway	3.26538
female	positive regulation of defense response	3.25828
female	regulation of innate immune response	3.25448
female	positive regulation of response to biotic stimulus	3.24708
female	positive regulation of type ii interferon production	3.19528
female	response to virus	3.13728
female	positive regulation of interleukin 1 production	3.10051
female	cellular response to biotic stimulus	3.08069
female	interleukin 6 production	2.8796
female	activation of immune response	2.79375
female	immune response regulating signaling pathway	2.65808
female	regulation of response to biotic stimulus	2.62047
female	cellular response to lipoprotein particle stimulus	2.17473
female	i kappab kinase nf kappab signaling	2.03413
female	inflammasome complex assembly	2.0258
female	type ii interferon production	2.02296
female	response to molecule of bacterial origin	2.01918
female	positive regulation of i kappab kinase nf kappab signaling	1.83896
female	interleukin 1 beta production	1.79102
female	positive regulation of interleukin 6 production	1.7892
female	regulation of immune effector process	1.67499
female	interleukin 1 production	1.65988
female	leukocyte mediated immunity	1.62051
female	tumor necrosis factor superfamily cytokine production	1.54245
female	positive regulation of immune effector process	1.52043
female	innate immune response activating cell surface receptor signaling pathway	1.48761
female	negative regulation of cytokine production	1.47546
female	interleukin 8 production	1.4552
female	regulation of response to cytokine stimulus	1.36674
female	cytokine mediated signaling pathway	1.31358
female	negative regulation of interleukin 6 production	1.3127
male	mitotic metaphase plate congression	1.53985
male	chromosome segregation	1.49689
male	negative regulation of myosin light chain phosphatase activity	1.48686
male	positive regulation of protein localization to cell surface	1.3542
male	sister chromatid segregation	1.34304

## Sheet: GlutamatergicNeuronsFemale
gene	medianlogFC	chr
Xist	2.10572	chrX
Gm26992	1.18671	chrX
Kdm6a	0.376746	chrX
Eif2s3x	0.350284	chrX
Pbdc1	0.304755	chrX
Kdm5c	0.243777	chrX
Ddx3x	0.169385	chrX
Ftx	0.16735	chrX
Trim30a	0.0982126	chr7
Fem1b	0.0810868	chr9
Vmn2r29	0.0805321	chr7
Sla	0.0629537	chr15
BC100451	0.0538422	chr11
Utp14a	0.0522191	chrX
Fam162a	0.0497561	chr16
Fam134b	0.0485015	chr15
Zfp758	0.0483808	chr17
Kdm3a	0.047326	chr6
Gm20388	0.0472901	chr8
P2rx4	0.046787	chr5
Dubr	0.0457122	chr16
Zfp617	0.042627	chr8
Cntrob	0.0425974	chr11
Mtfmt	0.0415777	chr9
Gm17484	0.04122	chr8
Zbtb38	0.0402154	chr9
BC068281	0.0400334	chr12
Serac1	0.0396626	chr17
Ptk2b	0.0396384	chr14
Gm15446	0.0395764	chr5
Sergef	0.0390818	chr7
Wsb1	0.0386202	chr11
Tmem29	0.0385762	chrX
Tmem209	0.0379794	chr6
Gatm	0.037546	chr2
Nup210l	0.0371928	chr3
Alkbh5	0.0369947	chr11
Narfl	0.0353801	chr17
Chst12	0.0353626	chr5
Zfp975	0.0351623	chr7
Spen	0.0347247	chr4
Senp8	0.034635	chr9
Tuft1	0.03458	chr3
Gm42418	0.034417	chr17
Gm1976	0.0342547	chr17
Parp16	0.0338126	chr9
3300002I08Rik	0.0336717	chr2
Atmin	0.03359	chr8
Stambp	0.0334921	chr6
Zfp606	0.0331639	chr7
P4ha1	0.0329648	chr10
Ppard	0.0328749	chr17
Mpp7	0.0308868	chr18
Zfp932	0.0307964	chr5
Elk4	0.0307895	chr1
Tk2	0.030643	chr8
Gm20422	0.0305877	chr8
Ppp1r10	0.0301562	chr17
Tnip2	0.0300126	chr5
Mfsd8	0.0299795	chr3
Jdp2	0.0296647	chr12
Zfp101	0.0295785	chr17
Zbtb37	0.0295481	chr1
Abhd18	0.0295336	chr3
4931406C07Rik	0.0294473	chr9
Zfp426	0.0294084	chr9
Zfp169	0.0288944	chr13
Sbds	0.0288499	chr5
Slc22a5	0.0287722	chr11
Zfp1	0.0285984	chr8
Ube2b	0.0280498	chr11
D3Ertd751e	0.0280078	chr3
Crot	0.0280063	chr5
Tle3	0.0279393	chr9
Zfp866	0.0277808	chr8
Cdkl3	0.027759	chr11
Usp49	0.0276232	chr17
Polr1b	0.0275744	chr2
Adnp2	0.0272102	chr18
Sgce	0.027144	chr6
Cxxc5	0.0269426	chr18
4931406P16Rik	0.0269249	chr7
Asl	0.0269087	chr5
Wdr25	0.0268833	chr12
Zfp160	0.0268038	chr17
Gipc1	0.0267091	chr8
Acox1	0.0265365	chr11
Ethe1	0.0261744	chr7
Chid1	0.0261065	chr7
Eapp	0.0259823	chr12
Ccpg1	0.0258367	chr9
Ints2	0.0256453	chr11
Zfp790	0.0256057	chr7
Zfp873	0.0250625	chr10
Fam118a	0.0245539	chr15
Gtf2h1	0.0245199	chr7
1700020I14Rik	0.024212	chr2
Ccdc106	0.0241403	chr7
Ifnar1	0.0239925	chr16
Inpp1	0.0239782	chr1
Etv3	0.0239688	chr3
Mmaa	0.0237804	chr8
Galnt3	0.0237503	chr2
Zbtb34	0.0236404	chr2
Eogt	0.0234948	chr6
Zfp445	0.0234191	chr9
Lonrf1	0.0232676	chr8
Sp1	0.0231977	chr15
Spcs2	0.0230268	chr7
Pfkfb4	0.0229834	chr9
Seh1l	0.022983	chr18
Mob1a	0.0228675	chr6
Arl4c	0.022704	chr1
B3galnt1	0.0226313	chr3
Tbpl1	0.0226093	chr10
Zscan21	0.022558	chr5
Gm20537	0.0223578	chr9
Rprd1b	0.0223183	chr2
Selenoi	0.0222447	chr5
Ccdc58	0.0222014	chr16
Atp6v0d1	0.0220354	chr8
Gna13	0.0218669	chr11
Egln1	0.0217097	chr8
Zfp629	0.021675	chr7
Sun1	0.0215904	chr5
Abhd6	0.0215136	chr14
Lyrm9	0.0214726	chr11
Sorl1	0.0214391	chr9
Vps45	0.0214132	chr3
Zfp933	0.0213756	chr4
Timm17a	0.0213061	chr1
Zfp62	0.0212304	chr11
Vapb	0.021147	chr2
Tiam1	0.0211105	chr16
Bin3	0.0210872	chr14
Zfp113	0.0210119	chr5
Commd7	0.0209408	chr2
Zfp763	0.0207443	chr17
Ensa	0.020664	chr3
Zfp292	0.0205769	chr4
D6Wsu163e	0.0205135	chr6
Dcaf17	0.0203748	chr2
Hmgcl	0.0203174	chr4
Zfp652	0.0202956	chr11
Ddb2	0.0200725	chr2
Hic2	0.0200398	chr16
Tbc1d15	0.0199627	chr10
Cnep1r1	0.0199615	chr8
Ndufv2	0.019815	chr17
Smim10l1	0.0197994	chr6
Zfp609	0.0196523	chr9
Zfp952	0.0194983	chr17
Phf12	0.0193431	chr11
Cnbd2	0.0191285	chr2
Pstpip2	0.019038	chr18
Fbxl3	0.0188858	chr14
Zfp458	0.018676	chr13
Tollip	0.0185955	chr7
Mapre2	0.0185033	chr18
Lca5	0.0183523	chr9
Mfsd7b	0.0183065	chr1
Zfp668	0.0181851	chr7
Disc1	0.018041	chr8
Zfp846	0.017943	chr9
Hdhd2	0.0178065	chr18
Clpb	0.0177078	chr7
Orc3	0.0175908	chr4
Cryl1	0.0175875	chr14
Bach1	0.0175685	chr16
Cinp	0.0175078	chr12
Dus2	0.0173519	chr8
Dtd1	0.0172355	chr2
Ttc19	0.017231	chr11
Sertad2	0.017144	chr11
Cers5	0.0170765	chr15
Usp4	0.0169805	chr9
Ssu72	0.0169141	chr4
Zfp142	0.016842	chr1
Dstyk	0.0167961	chr1
Socs6	0.0167651	chr18
Shcbp1l	0.0166171	chr1
Fig4	0.0162192	chr10
Zfp958	0.0162108	chr8
Kif1bp	0.0160847	chr10
Ncbp2	0.0160556	chr16
Mynn	0.0157848	chr3
Ino80d	0.0157197	chr1
0610040J01Rik	0.0156611	chr5
Ripk2	0.0154397	chr4
Tmem222	0.0153443	chr4
Fbxo45	0.0151685	chr16
Rnf185	0.0150581	chr11
Fam45a	0.0149971	chr19
Zfyve1	0.0146488	chr12
Zfp157	0.0145279	chr5
Isy1	0.0145233	chr6
Drg1	0.0143544	chr11
Srpr	0.0142461	chr9
Mccc1	0.0142356	chr3
Zfp961	0.014142	chr8
Pdik1l	0.0140932	chr4
Plekhb2	0.0139779	chr1
Slc30a6	0.0138976	chr17
Ccm2	0.0138748	chr11
Ppp4r2	0.0138342	chr6
Lsm14a	0.0137755	chr7
Fez2	0.0137367	chr17
Tm9sf2	0.0133879	chr14
Otud7b	0.0133304	chr3
Mettl8	0.0131807	chr2
Lmbrd2	0.0130147	chr15
Casp7	0.0127635	chr19
Ppm1k	0.0126196	chr6
Apaf1	0.0124961	chr10
Esco1	0.0124348	chr18
Lats1	0.0116956	chr10
Dcaf5	0.0115344	chr12
Cdk5rap1	0.0113845	chr2
Prdm2	0.0112657	chr4
Gpr107	0.0108856	chr2
Slc25a38	0.0108665	chr9
Usf3	0.0107449	chr16
Bid	0.0101793	chr6
Igsf10	0.00990967	chr3
Rbm19	0.00951999	chr5
Pparg	0.00763129	chr6

## Sheet: GlutamatergicNeuronsMale
gene	medianlogFC	chr
Ddx3y	-1.68701	chrY
Eif2s3y	-1.66291	chrY
Kdm5d	-1.63219	chrY
Uty	-1.5735	chrY
Mid1	-0.133245	chrX
Stag3	-0.0849126	chr5
Col1a2	-0.0563301	chr6
Epo	-0.0562227	chr5
Afdn	-0.0539726	chr17
Tubb5	-0.0525347	chr17
Pvt1	-0.0497612	chr15
Mxd4	-0.0487563	chr5
Minpp1	-0.0474336	chr19
Zfp760	-0.0471092	chr17
Rps9	-0.0465939	chr7
Arhgdia	-0.0462312	chr11
Gabbr1	-0.0428257	chr17
Tbl3	-0.0425587	chr17
Arhgef3	-0.0423247	chr14
Clasrp	-0.0399939	chr7
Hectd3	-0.0398788	chr4
Emc10	-0.0388168	chr7
Arf5	-0.0387971	chr6
Mknk2	-0.0384735	chr10
Telo2	-0.0382043	chr17
Ang	-0.03689	chr14
Ahr	-0.0364626	chr12
Cfl1	-0.0362689	chr19
Grk5	-0.0362524	chr19
Csad	-0.0352958	chr15
Wdr13	-0.0350514	chrX
Rps15	-0.0349016	chr10
Fbrs	-0.034478	chr7
Ccdc107	-0.0341501	chr4
Parn	-0.0340975	chr16
Tecpr1	-0.0340534	chr5
Rpl22	-0.0339422	chr4
Zfp518a	-0.03393	chr19
Gnai2	-0.0335714	chr9
Nkap	-0.0324853	chrX
Ddb1	-0.0324513	chr19
Tspyl2	-0.0320835	chrX
Pdrg1	-0.0318316	chr2
Znhit6	-0.0316184	chr3
Plxnd1	-0.0315984	chr6
Aup1	-0.0315893	chr6
Gps2	-0.0315826	chr11
Cfp	-0.0315408	chrX
Ilvbl	-0.0314994	chr10
Leng8	-0.0314805	chr7
Yars	-0.0314721	chr4
3110002H16Rik	-0.0313489	chr18
Mettl1	-0.0313433	chr10
Pde1b	-0.0312914	chr15
Vasp	-0.0302181	chr7
Wash1	-0.0296213	chr17
Adgrl1	-0.0293327	chr8
Gm5914	-0.0293214	chr8
Wiz	-0.0289846	chr17
Ttyh3	-0.0289652	chr5
Gramd1a	-0.0289584	chr7
Zfp948	-0.0288101	chr17
Safb2	-0.0286568	chr17
Psmd3	-0.0280988	chr11
Mib2	-0.0277889	chr4
Dpp9	-0.0276165	chr17
Rpl13	-0.0275868	chr8
Pinx1	-0.0274371	chr14
Rpl14	-0.0269183	chr9
Tbc1d2b	-0.026815	chr9
Fscn1	-0.0265085	chr5
Dennd1c	-0.0264249	chr17
Zmat2	-0.0263527	chr18
Bscl2	-0.0263128	chr19
Tns1	-0.0257844	chr1
Cluh	-0.0257569	chr11
Rps6ka4	-0.025277	chr19
Traip	-0.0251082	chr9
Baz1a	-0.0250028	chr12
Suds3	-0.0247659	chr5
Ppfia1	-0.0247428	chr7
Rps8	-0.0244565	chr4
Herc2	-0.0244041	chr7
Amotl1	-0.0242894	chr9
Mrpl52	-0.0240329	chr14
Lrpprc	-0.0234483	chr17
Ss18	-0.0233712	chr18
Iffo2	-0.0230841	chr4
Vps9d1	-0.0230206	chr8
Ergic3	-0.0229035	chr2
Mlf2	-0.0224075	chr6
Rnf187	-0.0222497	chr11
Urm1	-0.0221085	chr2
Lztr1	-0.0219126	chr16
Slc16a6	-0.0218426	chr11
Zmiz2	-0.0215584	chr11
Ap3m2	-0.0211458	chr8
Ipo13	-0.0211137	chr4
Bnip1	-0.0210612	chr17
Snf8	-0.0209541	chr11
Rpl11	-0.0206457	chr4
Eif3d	-0.0204294	chr15
Anks3	-0.0203416	chr16
Susd1	-0.0202421	chr4
Atg9a	-0.0200797	chr1
Rnf31	-0.0199245	chr14
Synj2bp	-0.0198486	chr12
Gle1	-0.0198477	chr2
Ispd	-0.0195954	chr12
Taf6	-0.0193732	chr5
Abcb8	-0.019149	chr5
Tln1	-0.0191105	chr4
Gorasp2	-0.0188848	chr2
Cdan1	-0.0188542	chr2
Klc2	-0.0186647	chr19
Dock2	-0.018529	chr11
Rtcb	-0.018451	chr10
Heatr6	-0.0182721	chr11
Arhgef2	-0.0181835	chr3
Uchl5	-0.0179131	chr1
Parg	-0.0175137	chr14
Man1a2	-0.0175051	chr3
Wars	-0.0170386	chr12
Ppp1r9a	-0.0166454	chr6
Fxr1	-0.0164444	chr3
Cyfip1	-0.0163983	chr7
Ttc37	-0.0162315	chr13
Pkd1	-0.015946	chr17
Ecd	-0.0157719	chr14
Zfp182	-0.0156931	chrX
Cox18	-0.0156656	chr5
Dgat1	-0.0154857	chr15
Exoc7	-0.0154519	chr11
Thoc1	-0.0149481	chr18
Uqcrc1	-0.014258	chr9
Fam13b	-0.0141978	chr18
Top1	-0.014139	chr2
Myo7a	-0.0139557	chr7
Poc5	-0.0137025	chr13
Zkscan6	-0.0136347	chr11
Cdk20	-0.0135779	chr13
Ppil4	-0.013127	chr10
Dhx57	-0.0131047	chr17
Mapkap1	-0.0129844	chr2
Zfand5	-0.012966	chr19
Cramp1l	-0.0129657	chr17
Gm15800	-0.0129575	chr5
Tnfrsf11a	-0.0128637	chr1
Kif5b	-0.0126836	chr18
Tbc1d12	-0.0124478	chr19
Rbm27	-0.0124202	chr18
Ikbkb	-0.0122638	chr8
Mark3	-0.0121036	chr12
Nfyc	-0.0100638	chr4
Ipo11	-0.0100597	chr13
Arhgef12	-0.00994112	chr9
Lrrfip2	-0.00991754	chr9
Cdc40	-0.00892763	chr10
Ep400	-0.00856256	chr5
Rabggta	-0.00580873	chr14
Myo1c	-0.00416347	chr11
Tbc1d10a	-0.00401983	chr11
